# Supplementary material for: Comparison between the Effects of Adding Vitamins, Trace Elements, and Nanoparticles to SHOTOR Extender on the Cryopreservation of Dromedary Camel Epididymal Spermatozoa
Source: MDPI journal article supplement (doi:10.3390/ani10010078), 2020-01-02

**Table S1.** Characteristics of ZnONPs and SeNPs.

| <b>Sample</b> | <b>Particle size (nm)</b> | <b>PDI</b>   | <b>Zeta potential (mV)</b> |
|---------------|---------------------------|--------------|----------------------------|
| ZnONPs        | 30.92 ± 1.25              | 0.54 ± 0.006 | 32.16 ± 0.252              |
| SeNPs         | 78.47 ± 17.93             | 0.29 ± 0.23  | -20.36 ± 1.79              |

DPI: polydispersity index

Figure S1. Representative particle size distribution (A) and zeta potential (B) curves of ZnNPs.

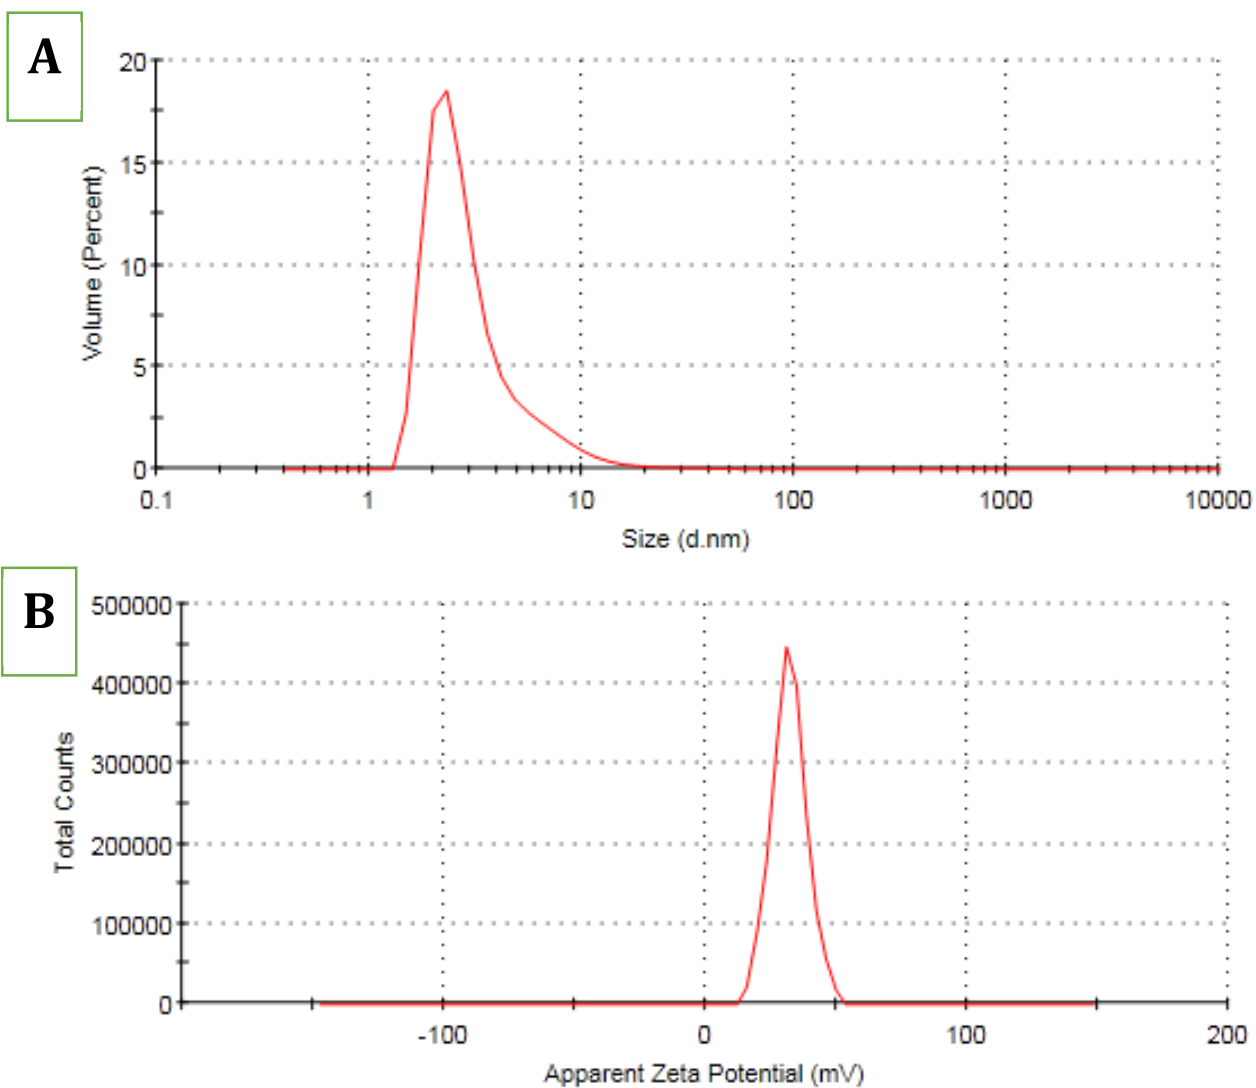

Figure S2. Representative particle size distribution (A) and zeta potential (B) curves of SeNPs.

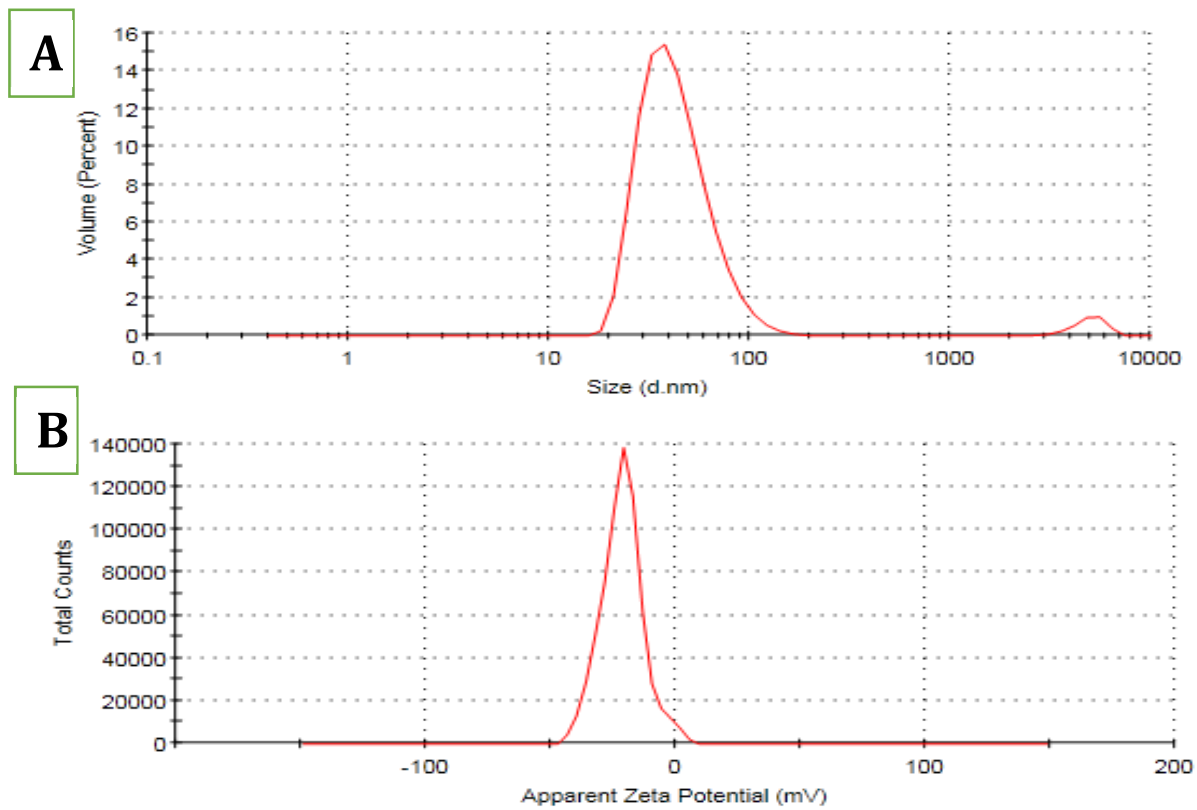

Figure S3. The raw data of two replicates for annexin V flow cytometry.

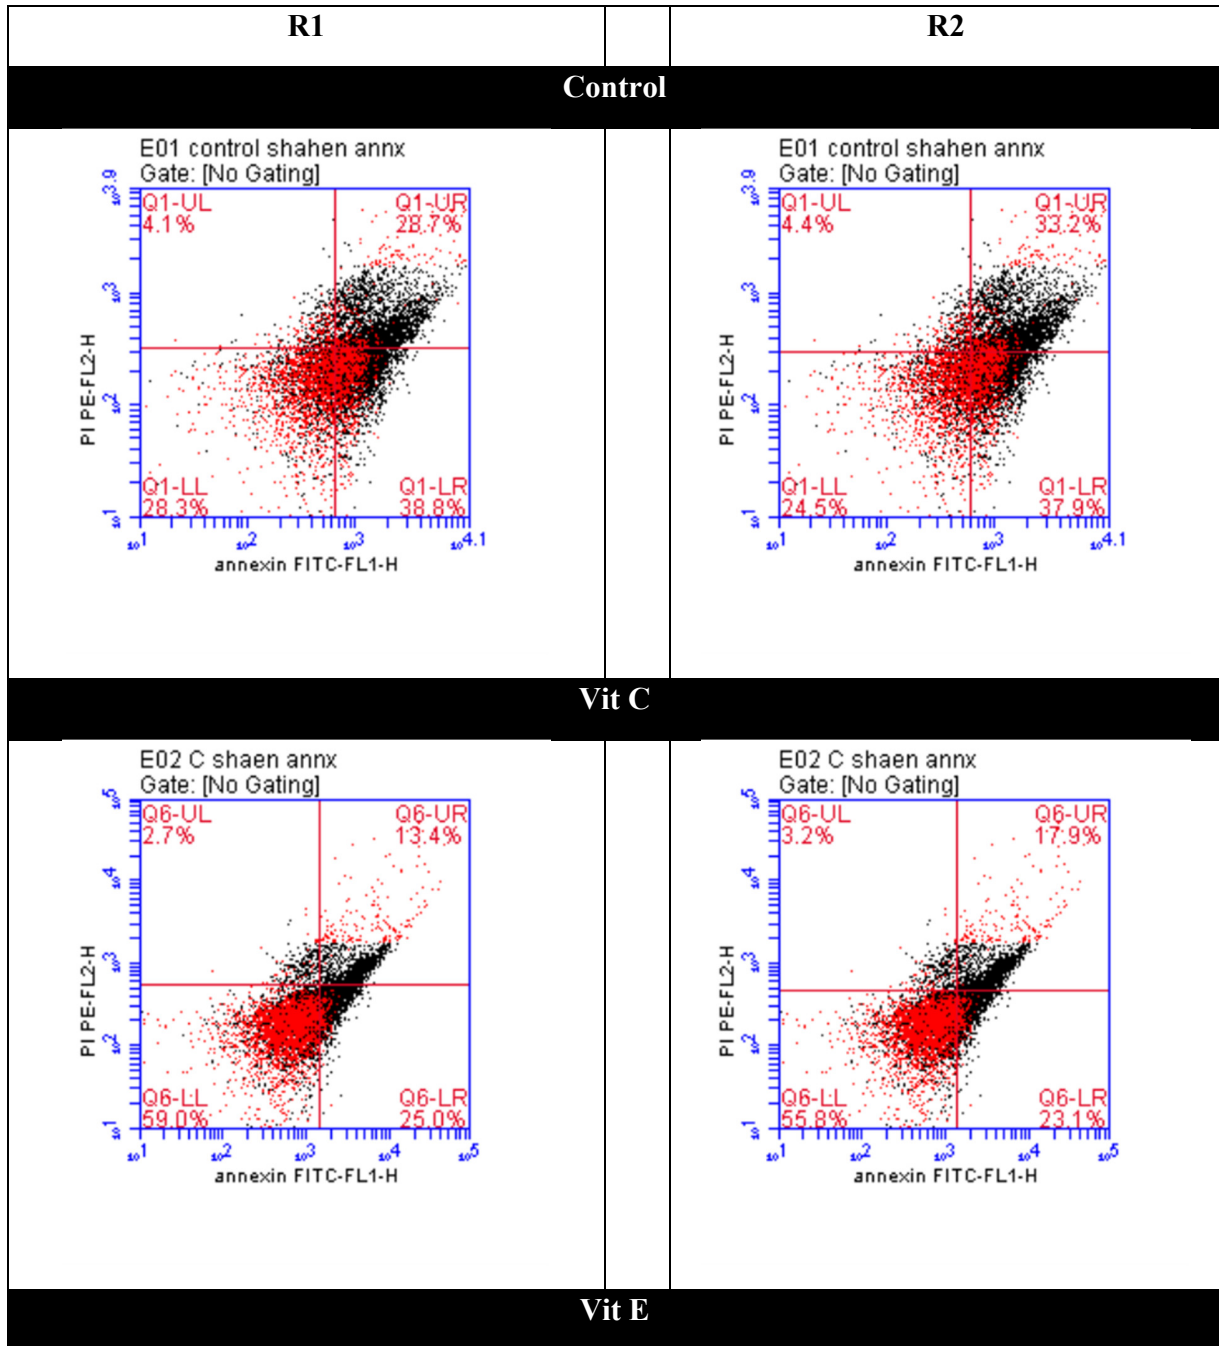

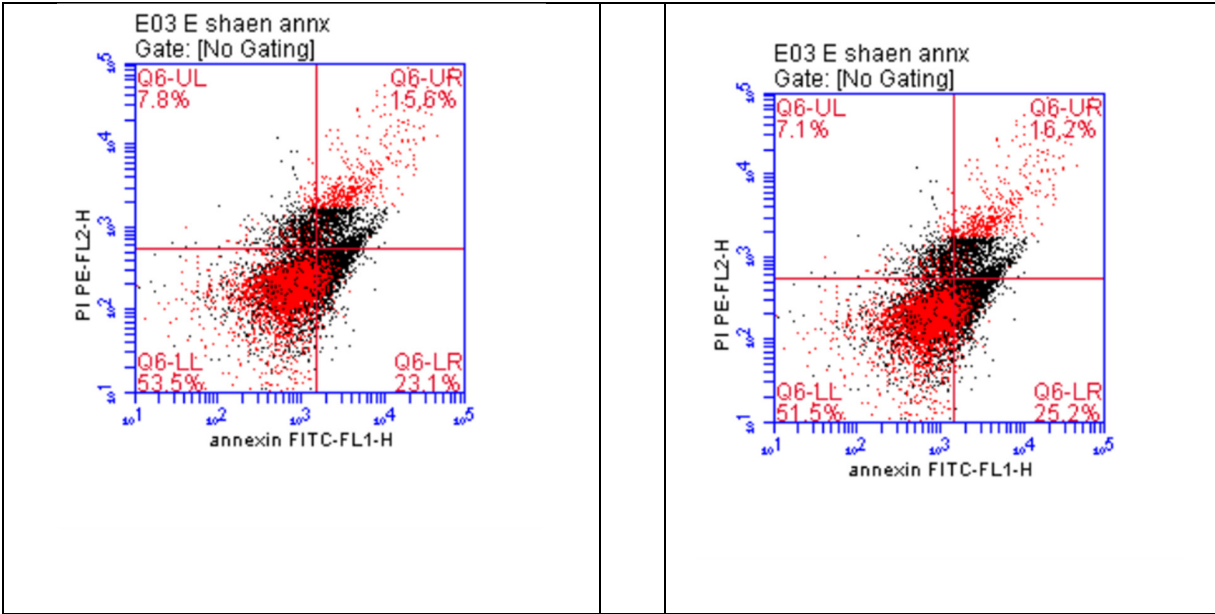

**Nano Se**

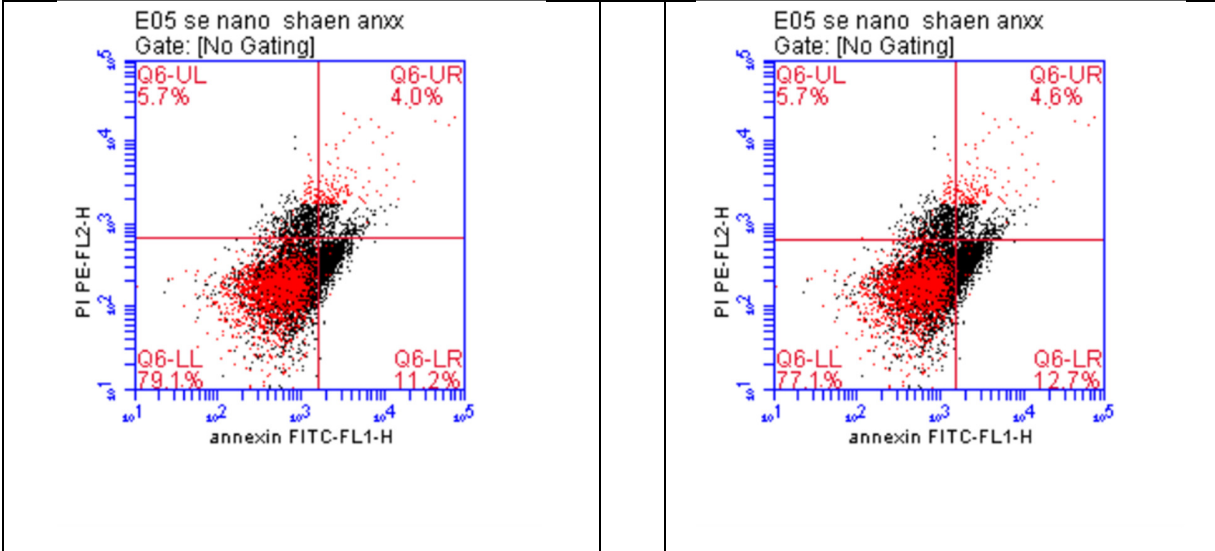

**Sodium selenite**

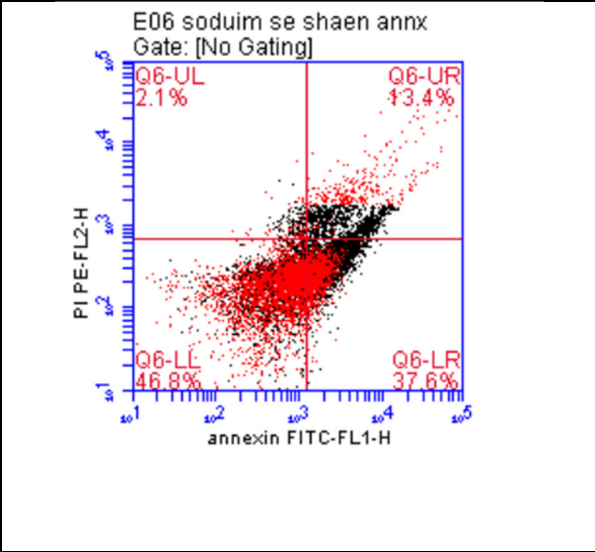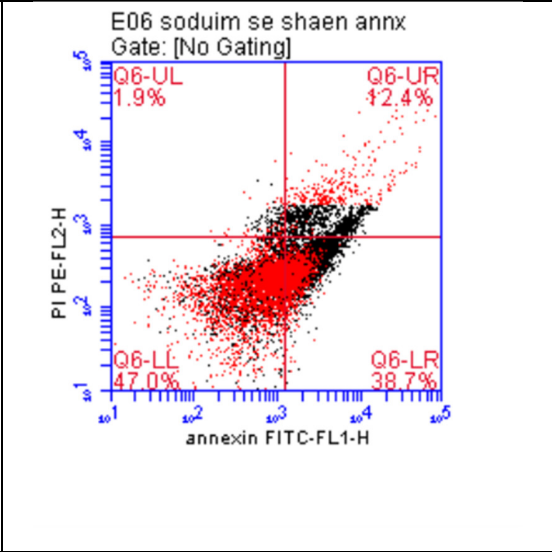

**Nano Zn**

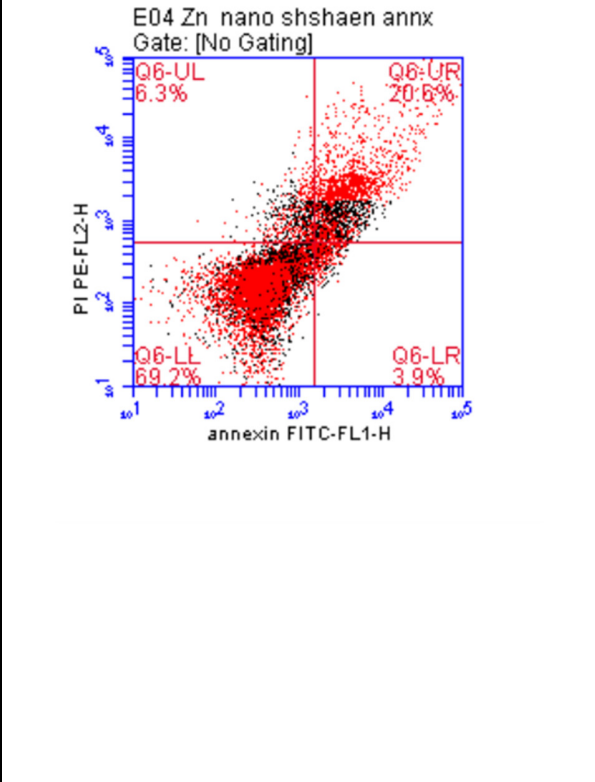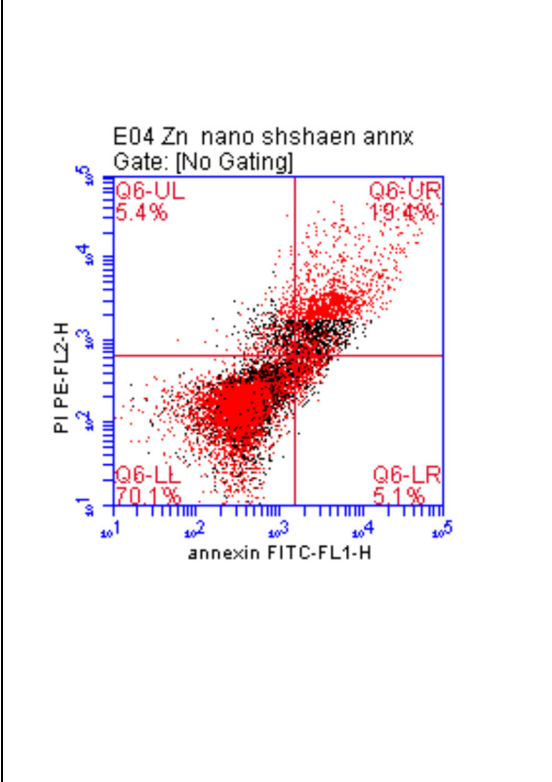

**Zn sulphate**

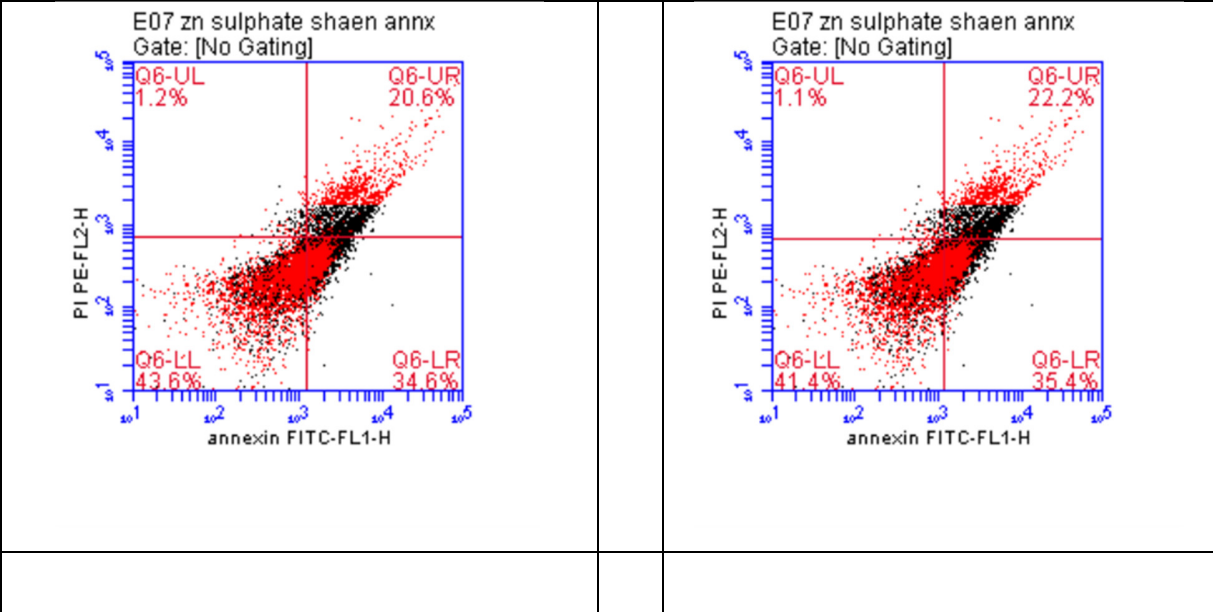

Supplement: s1 [file s1]
